# Supplementary material for: ACC/AHA Hypertension Guidelines and CHA2DS2-VASc Up-Scoring in Patients With Atrial Fibrillation
Source: PubMed Central journal article supplement (PMC10523168; doi:10.1001/jamanetworkopen.2023.35722), 2023-09-26

## Supplemental Online Content

Pundi K, Gosch KL, Perino AC, et al. ACC/AHA hypertension guidelines and CHA<sub>2</sub>DS<sub>2</sub>-VASc up-scoring in patients with atrial fibrillation. *JAMA Netw Open*. 2023;6(9):e2335722. doi:10.1001/jamanetworkopen.2023.35722

**eTable.** CHA<sub>2</sub>DS<sub>2</sub>-VASc Score Definitions

**eFigure.** Cohort Selection Diagram

This supplemental material has been provided by the authors to give readers additional information about their work.

**eTable.** CHA<sub>2</sub>DS<sub>2</sub>-VASc Score Definitions

| <b><u>Component</u></b>                 | <b><u>Definition</u></b>                                                                                                                                                                                                                                                                                                                                     | <b><u>Points</u></b> |
|-----------------------------------------|--------------------------------------------------------------------------------------------------------------------------------------------------------------------------------------------------------------------------------------------------------------------------------------------------------------------------------------------------------------|----------------------|
| <b>Congestive heart failure</b>         | Presence of heart failure diagnosis, or LV systolic function is moderately or severely reduced                                                                                                                                                                                                                                                               | 1                    |
| <b>Hypertension</b>                     | Presence of hypertension diagnosis or systolic blood pressure $\geq$ 140 and/or diastolic blood pressure $\geq$ 90 at two encounters within a 2-year time frame                                                                                                                                                                                              | 1                    |
| <b>Age</b>                              | Age at encounter                                                                                                                                                                                                                                                                                                                                             | 1-2                  |
| <b>Diabetes mellitus</b>                | Presence of diabetes mellitus diagnosis                                                                                                                                                                                                                                                                                                                      | 1                    |
| <b>Stroke/transient ischemic attack</b> | History of stroke (ischemic or hemorrhagic) or transient ischemic attack                                                                                                                                                                                                                                                                                     | 2                    |
| <b>Vascular disease</b>                 | History of peripheral artery disease, limb ischemia, claudication, peripheral vascular intervention, peripheral vascular disease, myocardial infarction, coronary artery bypass grafts, percutaneous coronary intervention, carotid endarterectomy, coronary artery disease, lower extremity osteomyelitis, foot/leg cellulitis, or peripheral artery bypass | 1                    |
| <b>Sex Category</b>                     | Reported sex                                                                                                                                                                                                                                                                                                                                                 | 1                    |

**eFigure.** Cohort Selection Diagram

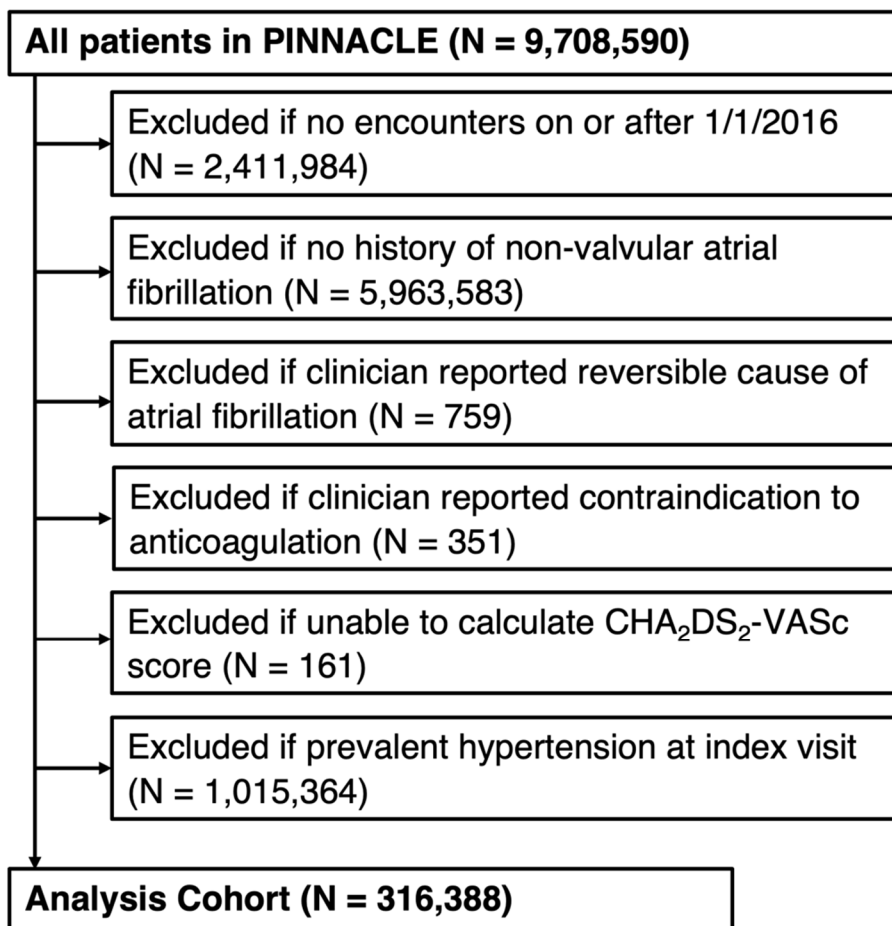

Supplement: jamanetwopen-e2335722-s001.pdf [file jamanetwopen-e2335722-s001.pdf]
