# Supplementary material for: ACC/AHA Hypertension Guidelines and CHA2DS2-VASc Up-Scoring in Patients With Atrial Fibrillation
Source: PubMed Central journal article supplement (PMC10523168; doi:10.1001/jamanetworkopen.2023.35722), 2023-09-26
Supplement: jamanetwopen-e2335722-s002.pdf [file jamanetwopen-e2335722-s002.pdf]

## Data Sharing Statement

Pundi. ACC/AHA Hypertension Guidelines and CHA<sub>2</sub>DS<sub>2</sub>-VASc Up-Scoring in Patients With Atrial Fibrillation. *JAMA Netw Open*. Published September 26, 2023.  
doi:10.1001/jamanetworkopen.2023.35722

### Data

**Data available:** No

### Additional Information

**Explanation for why data not available:** Due to data sharing agreements, the investigators of this study cannot make the data freely available. However, qualified investigators can request PINNACLE data from the National Cardiovascular Data Registry, which is managed by the American College of Cardiology (ACC).
